# Supplementary material for: Stoichiometric network analysis in reaction networks yielding spontaneous mirror symmetry breaking in a prebiotic atmosphere
Source: Royal Society of Chemistry journal article supplement (doi:10.1039/d2cp00538g), 2022-01-01
Supplement: d2cp00538g1.pdf [file d2cp00538g1.pdf]

## Electronic Supplementary Information for: Stoichiometric Network Analysis in Reaction Networks Yielding Spontaneous Mirror Symmetry Breaking in Prebiotic Atmosphere

Rubén D. Bourdon-García\*, Jesús Ágreda, Javier Burgos-Salcedo, David Hochberg,  
Josep M. Ribó, Pedro Bargeño, and Andrés Estupiñan Salamanca

The extreme currents matrix  $\mathbf{E}$  and the explicit extreme currents of KNS-LES, KNSCI and KNSCI-LES models

Extreme currents matrix  $\mathbf{E}$  of KNS-LES model.

$$\mathbf{E} = \begin{pmatrix} 0 & 0 & 0 & 0 & 0 & 0 & 0 & 0 & 0 & 0 & 0 & 0 & 0 & 0 & 0 & 1 & 0 & 0 & 1 & 0 & 0 & 0 & 1 & 0 & 1 \\ 0 & 0 & 0 & 0 & 0 & 0 & 0 & 0 & 0 & 0 & 0 & 0 & 0 & 0 & 0 & 0 & 0 & 0 & 0 & 0 & 0 & 1 & 0 & 0 & 1 & 1 \\ 0 & 0 & 1 & 0 & 0 & 1 & 0 & 0 & 0 & 1 & 0 & 1 & 0 & 0 & 0 & 0 & 0 & 0 & 0 & 0 & 0 & 0 & 0 & 0 & 0 & 0 \\ 0 & 0 & 0 & 0 & 0 & 0 & 0 & 1 & 0 & 0 & 1 & 1 & 0 & 0 & 0 & 0 & 0 & 0 & 0 & 0 & 0 & 0 & 0 & 0 & 0 & 0 \\ 0 & 0 & 0 & 0 & 0 & 0 & 0 & 0 & 0 & 0 & 0 & 0 & 0 & 0 & 1 & 0 & 0 & 1 & 0 & 0 & 0 & 1 & 0 & 1 & 0 & 1 & 0 \\ 0 & 0 & 0 & 0 & 0 & 0 & 0 & 0 & 0 & 0 & 0 & 0 & 0 & 0 & 0 & 0 & 0 & 0 & 0 & 0 & 1 & 0 & 1 & 1 & 0 & 0 & 0 \\ 0 & 1 & 0 & 0 & 1 & 0 & 0 & 0 & 1 & 0 & 1 & 0 & 0 & 0 & 0 & 0 & 0 & 0 & 0 & 0 & 0 & 0 & 0 & 0 & 0 & 0 & 0 \\ 0 & 0 & 0 & 0 & 0 & 0 & 1 & 0 & 1 & 1 & 0 & 0 & 0 & 0 & 0 & 0 & 0 & 0 & 0 & 0 & 0 & 0 & 0 & 0 & 0 & 0 & 0 \\ 0 & 0 & 0 & 0 & 0 & 0 & 0 & 0 & 0 & 0 & 0 & 0 & 0 & 1 & 0 & 0 & 1 & 0 & 0 & 1 & 1 & 0 & 0 & 0 & 0 & 0 & 0 \\ 0 & 0 & 0 & 0 & 0 & 0 & 0 & 0 & 0 & 0 & 0 & 0 & 0 & 0 & 0 & 1 & 1 & 1 & 0 & 0 & 0 & 0 & 0 & 0 & 0 & 0 & 0 \\ 1 & 0 & 0 & 1 & 0 & 0 & 1 & 1 & 0 & 0 & 0 & 0 & 0 & 0 & 0 & 0 & 0 & 0 & 0 & 0 & 0 & 0 & 0 & 0 & 0 & 0 & 0 \\ 0 & 0 & 0 & 1 & 1 & 1 & 0 & 0 & 0 & 0 & 0 & 0 & 0 & 0 & 0 & 0 & 0 & 0 & 0 & 0 & 0 & 0 & 0 & 0 & 0 & 0 & 0 \\ 0 & 0 & 0 & 0 & 0 & 0 & 0 & 0 & 0 & 0 & 0 & 0 & 1 & 1 & 1 & 0 & 0 & 0 & 0 & 0 & 0 & 0 & 0 & 0 & 0 & 0 & 0 \\ 1 & 1 & 1 & 0 & 0 & 0 & 0 & 0 & 0 & 0 & 0 & 0 & 0 & 0 & 0 & 0 & 0 & 0 & 0 & 0 & 0 & 0 & 0 & 0 & 0 & 0 & 0 \end{pmatrix},$$

here, the columns are the extreme currents  $E_p$  ( $p = 1, \dots, 24$ ), from left to right, and the rows denote the reactions  $R_j$  ( $j = 1, \dots, 14$ ) from top to bottom. We verified that  $\nu\mathbf{E} = \mathbf{0}$  ( $\Leftrightarrow \nu\mathbf{v} = \mathbf{0}$ ). The explicit extreme currents of the stoichiometric network of KNS-LES model are in Table S1.

**Table S1.** Extreme currents of KNS - LES model.

| $E_i$    | Subnetwork                                                                           | Reactions        |
|----------|--------------------------------------------------------------------------------------|------------------|
| $E_1$    | $INH + HCN + L-CN \rightarrow L-CN + D-CN, D-CN \rightarrow D-AA + NH_3$             | $R_{11}, R_{14}$ |
| $E_2$    | $INH + HCN + D-CN \rightarrow 2D-CN, D-CN \rightarrow D-AA + NH_3$                   | $R_7, R_{14}$    |
| $E_3$    | $INH + HCN \rightarrow D-CN, D-CN \rightarrow D-AA + NH_3$                           | $R_3, R_{14}$    |
| $E_4$    | $INH + HCN + L-CN \rightarrow L-CN + D-CN, L-CN + D-CN \rightarrow INH + HCN + L-CN$ | $R_{11}, R_{12}$ |
| $E_5$    | $INH + HCN + D-CN \rightarrow 2D-CN, D-CN + L-CN \rightarrow L-CN + INH + HCN$       | $R_7, R_{12}$    |
| $E_6$    | $INH + HCN \rightarrow D-CN, D-CN + L-CN \rightarrow L-CN + INH + HCN$               | $R_3, R_{12}$    |
| $E_7$    | $INH + HCN + L-CN \rightarrow L-CN + D-CN, 2D-CN \rightarrow INH + HCN + D-CN$       | $R_{11}, R_8$    |
| $E_8$    | $INH + HCN + L-CN \rightarrow L-CN + D-CN, D-CN \rightarrow INH + HCN$               | $R_{11}, R_4$    |
| $E_9$    | $INH + HCN + D-CN \rightarrow 2D-CN, 2D-CN \rightarrow INH + HCN + D-CN$             | $R_7, R_8$       |
| $E_{10}$ | $INH + HCN \rightarrow D-CN, 2D-CN \rightarrow INH + HCN + D-CN$                     | $R_3, R_8$       |
| $E_{11}$ | $INH + HCN + D-CN \rightarrow 2D-CN, D-CN \rightarrow INH + HCN$                     | $R_7, R_4$       |
| $E_{12}$ | $INH + HCN \rightarrow D-CN, D-CN \rightarrow INH + HCN$                             | $R_3, R_4$       |
| $E_{13}$ | $INH + HCN + D-CN \rightarrow D-CN + L-CN, L-CN \rightarrow L-AA + NH_3$             | $R_9, R_{13}$    |
| $E_{14}$ | $INH + HCN + L-CN \rightarrow 2L-CN, L-CN \rightarrow L-AA + NH_3$                   | $R_5, R_{13}$    |
| $E_{15}$ | $INH + HCN \rightarrow L-CN, L-CN \rightarrow L-AA + NH_3$                           | $R_1, R_{13}$    |
| $E_{16}$ | $INH + HCN + D-CN \rightarrow D-CN + L-CN, D-CN + L-CN \rightarrow INH + HCN + D-CN$ | $R_9, R_{10}$    |
| $E_{17}$ | $INH + HCN + L-CN \rightarrow 2L-CN, L-CN + D-CN \rightarrow D-CN + INH + HCN$       | $R_5, R_{10}$    |
| $E_{18}$ | $INH + HCN \rightarrow L-CN, L-CN + D-CN \rightarrow D-CN + INH + HCN$               | $R_1, R_{10}$    |
| $E_{19}$ | $INH + HCN + D-CN \rightarrow D-CN + L-CN, 2L-CN \rightarrow INH + HCN + L-CN$       | $R_9, R_6$       |
| $E_{20}$ | $INH + HCN + D-CN \rightarrow D-CN + L-CN, L-CN \rightarrow INH + HCN$               | $R_9, R_2$       |
| $E_{21}$ | $INH + HCN + L-CN \rightarrow 2L-CN, 2L-CN \rightarrow INH + HCN + L-CN$             | $R_5, R_6$       |
| $E_{22}$ | $INH + HCN \rightarrow L-CN, 2L-CN \rightarrow INH + HCN + L-CN$                     | $R_1, R_6$       |
| $E_{23}$ | $INH + HCN + L-CN \rightarrow 2L-CN, L-CN \rightarrow INH + HCN$                     | $R_5, R_2$       |
| $E_{24}$ | $INH + HCN \rightarrow L-CN, L-CN \rightarrow INH + HCN$                             | $R_1, R_2$       |

Extreme currents matrix  $\mathbf{E}$  of KNSCI model.

$$\mathbf{E} = \begin{pmatrix} 0 & 0 & 0 & 0 & 0 & 1 & 0 & 0 & 0 & 1 & 1 & 1 \\ 0 & 0 & 0 & 0 & 0 & 0 & 1 & 0 & 0 & 1 & 0 & 0 \\ 0 & 1 & 0 & 1 & 0 & 0 & 0 & 0 & 1 & 0 & 0 & 1 \\ 0 & 0 & 1 & 1 & 0 & 0 & 0 & 0 & 0 & 0 & 0 & 0 \\ 0 & 0 & 0 & 0 & 1 & 0 & 1 & 1 & 1 & 0 & 0 & 0 \\ 0 & 0 & 0 & 0 & 1 & 1 & 0 & 0 & 0 & 0 & 0 & 0 \\ 1 & 0 & 1 & 0 & 0 & 0 & 0 & 1 & 0 & 0 & 1 & 0 \\ 1 & 1 & 0 & 0 & 0 & 0 & 0 & 0 & 0 & 0 & 0 & 0 \\ 0 & 0 & 0 & 0 & 0 & 0 & 1 & 1 & 0 & 1 & 1 & 1 \end{pmatrix},$$

each extreme current  $E_p$  ( $p = 1, \dots, 12$ ) represents a column vector of the matrix  $\mathbf{E}$ . The explicit extreme currents of KNSCI model are in Table S2.

**Table S2.** Extreme currents of KNSCI model.

| $E_i$    | Subnetwork                                                                                                     | Reactions       |
|----------|----------------------------------------------------------------------------------------------------------------|-----------------|
| $E_1$    | $INH + HCN + D-CN \rightarrow 2D-CN \rightarrow INH + HCN + D-CN$                                              | $R_7, R_8$      |
| $E_2$    | $INH + HCN \rightarrow D-CN \xrightarrow{D-CN} INH + HCN + D-CN$                                               | $R_3, R_8$      |
| $E_3$    | $INH + HCN + D-CN \rightarrow 2D-CN \xrightarrow{-D-CN} INH + HCN$                                             | $R_7, R_4$      |
| $E_4$    | $INH + HCN \rightarrow D-CN \rightarrow INH + HCN$                                                             | $R_3, R_4$      |
| $E_5$    | $INH + HCN + L-CN \rightarrow 2L-CN \rightarrow INH + HCN + L-CN$                                              | $R_5, R_6$      |
| $E_6$    | $INH + HCN \rightarrow L-CN \xrightarrow{L-CN} INH + HCN + L-CN$                                               | $R_1, R_6$      |
| $E_7$    | $INH + HCN + L-CN \rightarrow 2L-CN \xrightarrow{-L-CN} INH + HCN$                                             | $R_5, R_2$      |
| $E_8$    | $INH + HCN + D-CN \rightarrow 2D-CN$<br>$\xrightarrow{-D-CN, -L-CN} D, L-ADCN + NH_3$                          | $R_5, R_7, R_9$ |
| $E_9$    | $INH + HCN + L-CN \rightarrow 2L-CN$<br>$\xrightarrow{-L-CN} D, L-ADCN + NH_3$                                 | $R_3, R_5, R_9$ |
| $E_{10}$ | $INH + HCN \rightarrow L-CN \rightarrow INH + HCN$<br>$INH + HCN \rightarrow L-CN$                             | $R_1, R_2$      |
| $E_{11}$ | $INH + HCN + D-CN \rightarrow 2D-CN$<br>$\xrightarrow{-D-CN} D, L-ADCN + NH_3$<br>$INH + HCN \rightarrow D-CN$ | $R_1, R_7, R_9$ |
| $E_{12}$ | $\xrightarrow{\quad} D, L-ADCN + NH_3$<br>$INH + HCN \rightarrow L-CN$                                         | $R_1, R_3, R_9$ |

Extreme currents matrix  $\mathbf{E}$  of KNSCI-LES model.

$$\mathbf{E} = \begin{pmatrix} 0 & 0 & 0 & 0 & 0 & 0 & 0 & 0 & 0 & 0 & 0 & 1 & 0 & 0 & 0 & 0 & 0 & 0 & 1 & 0 & 0 & 0 & 0 & 1 & 1 & 1 & 1 \\ 0 & 0 & 0 & 0 & 0 & 0 & 0 & 0 & 0 & 0 & 0 & 0 & 0 & 1 & 0 & 0 & 0 & 0 & 0 & 1 & 0 & 0 & 0 & 1 & 0 & 0 & 0 \\ 0 & 0 & 1 & 0 & 0 & 0 & 1 & 0 & 1 & 0 & 0 & 0 & 0 & 0 & 0 & 0 & 1 & 0 & 0 & 0 & 0 & 0 & 1 & 0 & 0 & 0 & 1 \\ 0 & 0 & 0 & 0 & 1 & 0 & 0 & 1 & 1 & 0 & 0 & 0 & 0 & 0 & 0 & 0 & 0 & 0 & 0 & 0 & 0 & 0 & 0 & 0 & 0 & 0 & 0 \\ 0 & 0 & 0 & 0 & 0 & 0 & 0 & 0 & 0 & 0 & 1 & 0 & 0 & 0 & 0 & 0 & 0 & 0 & 1 & 0 & 1 & 1 & 1 & 1 & 0 & 0 & 0 \\ 0 & 0 & 0 & 0 & 0 & 0 & 0 & 0 & 0 & 0 & 0 & 0 & 0 & 0 & 0 & 0 & 1 & 1 & 0 & 0 & 0 & 0 & 0 & 0 & 0 & 0 & 0 \\ 0 & 1 & 0 & 0 & 0 & 1 & 0 & 1 & 0 & 0 & 0 & 0 & 0 & 0 & 1 & 0 & 0 & 0 & 0 & 0 & 1 & 0 & 0 & 0 & 1 & 0 & 0 \\ 0 & 0 & 0 & 1 & 0 & 1 & 1 & 0 & 0 & 0 & 0 & 0 & 0 & 0 & 0 & 0 & 0 & 0 & 0 & 0 & 0 & 0 & 0 & 0 & 0 & 0 & 0 \\ 0 & 0 & 0 & 0 & 0 & 0 & 0 & 0 & 0 & 1 & 0 & 0 & 1 & 1 & 1 & 1 & 1 & 0 & 0 & 0 & 0 & 0 & 0 & 0 & 0 & 0 & 0 \\ 0 & 0 & 0 & 0 & 0 & 0 & 0 & 0 & 0 & 1 & 1 & 1 & 0 & 0 & 0 & 0 & 0 & 0 & 0 & 0 & 0 & 0 & 0 & 0 & 0 & 0 & 0 \\ 1 & 0 & 0 & 1 & 1 & 0 & 0 & 0 & 0 & 0 & 0 & 0 & 0 & 0 & 1 & 0 & 0 & 0 & 0 & 0 & 1 & 0 & 0 & 0 & 1 & 0 & 0 \\ 1 & 1 & 1 & 0 & 0 & 0 & 0 & 0 & 0 & 0 & 0 & 0 & 0 & 0 & 0 & 0 & 0 & 0 & 0 & 0 & 0 & 0 & 0 & 0 & 0 & 0 & 0 \\ 0 & 0 & 0 & 0 & 0 & 0 & 0 & 0 & 0 & 0 & 0 & 0 & 0 & 0 & 1 & 1 & 1 & 0 & 0 & 0 & 1 & 1 & 1 & 0 & 1 & 1 & 1 \end{pmatrix},$$

each extreme current  $E_p$  ( $p = 1, \dots, 27$ ) represents a column vector of matrix  $\mathbf{E}$ . The explicit extreme currents of KNSCI-LES model are in Table S3.

**Table S3.** Extreme currents of KNSIC-LES model.

| $E_i$    | Subnetwork                                                                                                                                                   | Reactions             |
|----------|--------------------------------------------------------------------------------------------------------------------------------------------------------------|-----------------------|
| $E_1$    | $INH + HCN + L-CN \rightarrow D-CN + L-CN \rightarrow INH + HCN + L-CN$                                                                                      | $R_{11}, R_{12}$      |
| $E_2$    | $INH + HCN + D-CN \rightarrow 2D-CN \xrightarrow[-D-CN]{L-CN} INH + HCN + L-CN$                                                                              | $R_7, R_{12}$         |
| $E_3$    | $INH + HCN \rightarrow D-CN \xrightarrow{L-CN} INH + HCN + L-CN$                                                                                             | $R_3, R_{13}$         |
| $E_4$    | $INH + HCN + L-CN \rightarrow D-CN + L-CN \xrightarrow[-L-CN]{D-CN} INH + HCN + D-CN$                                                                        | $R_8, R_{11}$         |
| $E_5$    | $INH + HCN + L-CN \rightarrow D-CN + L-CN \xrightarrow[-L-CN]{L-CN} INH + HCN$                                                                               | $R_4, R_{11}$         |
| $E_6$    | $INH + HCN + D-CN \rightarrow 2D-CN \rightarrow INH + HCN + D-CN$                                                                                            | $R_7, R_8$            |
| $E_7$    | $INH + HCN \rightarrow D-CN \xrightarrow{D-CN} INH + HCN + D-CN$                                                                                             | $R_3, R_8$            |
| $E_8$    | $INH + HCN + D-CN \rightarrow 2D-CN \xrightarrow{-D-CN} INH + HCN$                                                                                           | $R_7, R_4$            |
| $E_9$    | $INH + HCN \rightarrow D-CN \rightarrow INH + HCN$                                                                                                           | $R_3, R_4$            |
| $E_{10}$ | $INH + HCN + D-CN \rightarrow D-CN + L-CN \rightarrow INH + HCN + D-CN$                                                                                      | $R_9, R_{10}$         |
| $E_{11}$ | $INH + HCN + L-CN \rightarrow 2L-CN \xrightarrow[-L-CN]{D-CN} INH + HCN + D-CN$                                                                              | $R_5, R_{10}$         |
| $E_{12}$ | $INH + HCN \rightarrow L-CN \xrightarrow{D-CN} INH + HCN + D-CN$                                                                                             | $R_1, R_{10}$         |
| $E_{13}$ | $INH + HCN + D-CN \rightarrow D-CN + L-CN \xrightarrow[-D-CN]{L-CN} INH + HCN + L-CN$                                                                        | $R_9, R_6$            |
| $E_{14}$ | $INH + HCN + D-CN \rightarrow D-CN + L-CN \xrightarrow[-D-CN]{-D-CN} INH + HCN$                                                                              | $R_4, R_{11}$         |
| $E_{15}$ | $INH + HCN + D-CN \rightarrow L-CN + D-CN$<br>$\xrightarrow[-L-CN]{-D-CN} D, L-ADCN$<br>$INH + HCN + L-CN \rightarrow D-CN + L-CN$                           | $R_9, R_{11}, R_{13}$ |
| $E_{16}$ | $INH + HCN + D-CN \rightarrow 2D-CN$<br>$\xrightarrow{-2D-CN} D, L-ADCN$<br>$INH + HCN + D-CN \rightarrow D-CN + L-CN$<br>$INH + HCN \rightarrow D-CN$       | $R_7, R_9, R_{13}$    |
| $E_{17}$ | $INH + HCN + D-CN \rightarrow D-CN + L-CN$<br>$\xrightarrow{-D-CN} D, L-ADCN$                                                                                | $R_3, R_9, R_{13}$    |
| $E_{18}$ | $INH + HCN + D-CN \rightarrow 2L-CN \rightarrow INH + HCN + L-CN$                                                                                            | $R_5, R_6$            |
| $E_{19}$ | $INH + HCN \rightarrow L-CN \xrightarrow{L-CN} INH + HCN + L-CN$                                                                                             | $R_1, R_6$            |
| $E_{20}$ | $INH + HCN + L-CN \rightarrow 2L-CN \xrightarrow{-L-CN} INH + HCN$<br>$INH + HCN + L-CN \rightarrow 2L-CN$                                                   | $R_5, R_2$            |
| $E_{21}$ | $INH + HCN + L-CN \rightarrow L-CN + D-CN$<br>$\xrightarrow{-2L-CN} D, L-ADCN$<br>$INH + HCN + L-CN \rightarrow 2L-CN$                                       | $R_5, R_{11}, R_{13}$ |
| $E_{22}$ | $INH + HCN + L-CN \rightarrow L-CN + D-CN$<br>$\xrightarrow[-L-CN]{-D-CN} D, L-ADCN$<br>$INH + HCN + D-CN \rightarrow 2D-CN$<br>$INH + HCN \rightarrow D-CN$ | $R_5, R_7, R_{13}$    |
| $E_{23}$ | $INH + HCN + L-CN \rightarrow 2L-CN$<br>$\xrightarrow{-L-CN} D, L-ADCN$                                                                                      | $R_3, R_5, R_{13}$    |
| $E_{24}$ | $INH + HCN \rightarrow L-CN \rightarrow INH + HCN$<br>$INH + HCN \rightarrow L-CN$                                                                           | $R_1, R_2$            |
| $E_{25}$ | $INH + HCN + L-CN \rightarrow L-CN + D-CN$<br>$\xrightarrow{-L-CN} D, L-ADCN$<br>$INH + HCN \rightarrow L-CN$                                                | $R_1, R_{11}, R_{13}$ |
| $E_{26}$ | $INH + HCN + D-CN \rightarrow 2D-CN$<br>$\xrightarrow{-D-CN} D, L-ADCN$<br>$INH + HCN \rightarrow L-CN$                                                      | $R_1, R_7, R_{13}$    |
| $E_{27}$ | $INH + HCN \rightarrow D-CN$<br>$\rightarrow D, L-ADCN$                                                                                                      | $R_1, R_3, R_{13}$    |
